# Supplementary material
Source: publisher figshare collection journal article supplement (https://frontiersin.figshare.com/ndownloader/files/23665751)
Supplement: Supplementary file 1 [file 23665751]

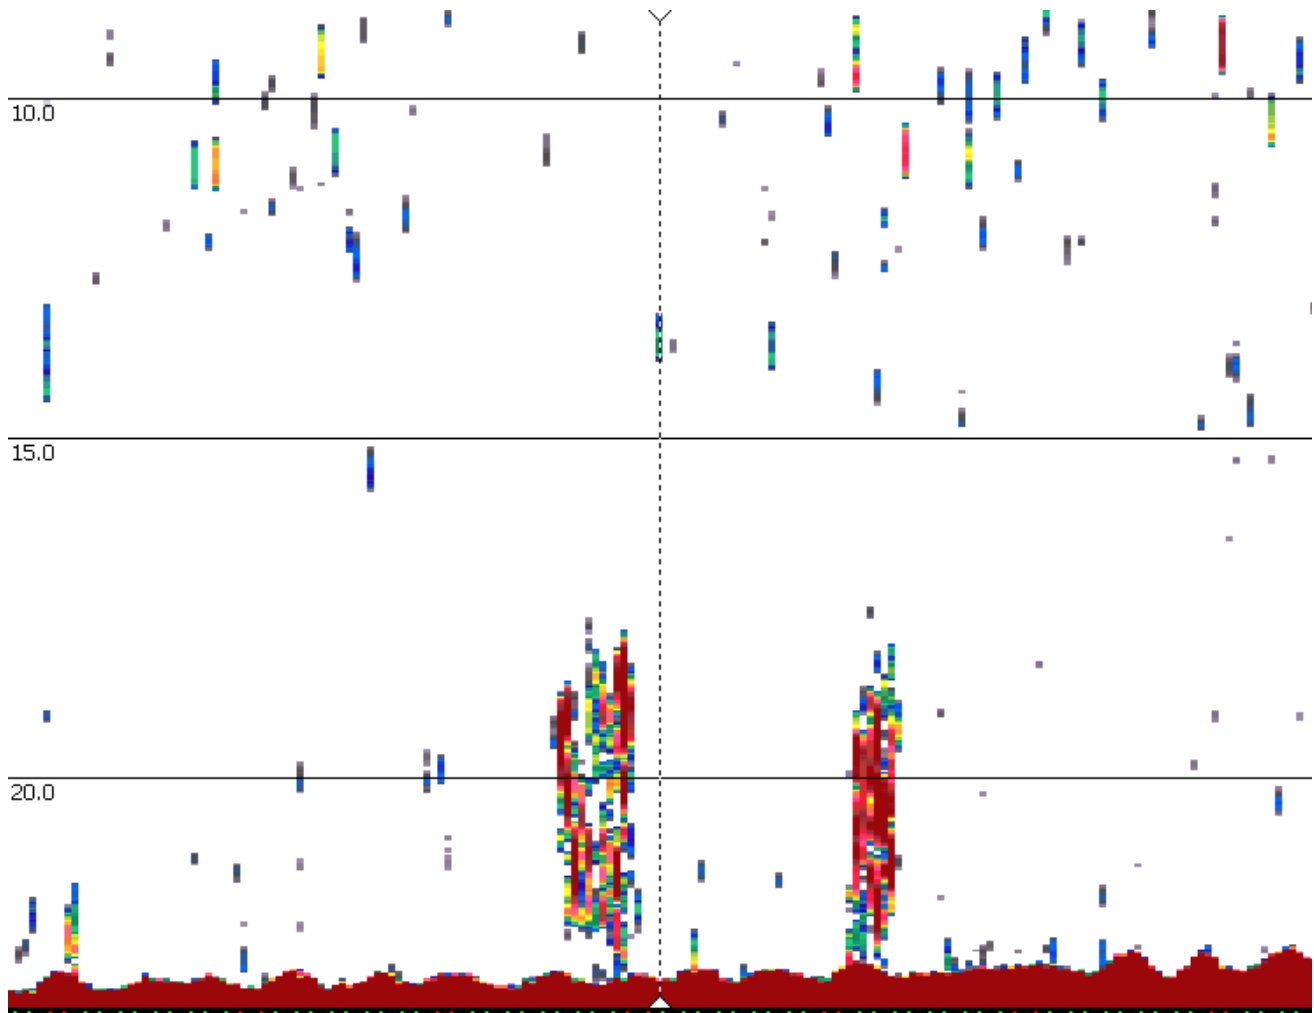

**Supplementary Figure 7: Echogram of typical pillar shaped schools of sprat (*Sprattus sprattus*) at 120 kHz; echogram provided by Matthias Schaber**
